# Supplementary material for: A Novel Nomogram Based on Orbital MRI Parameters for Early Prediction of Dysthyroid Optic Neuropathy in Thyroid-Associated Ophthalmopathy
Source: Research Square preprint supplement (doi:10.21203/rs.3.rs-7076749/v1), 2025-07-18
Supplement: Supplementary file 1 [file 3300656def9fec2d2e662d6d.xlsx]

## Sheet: MRI+PM
Patient Number	Severity	DON	Eye side	Ac	Ac%	Loc	Lmc	Vc	Vr	DRpz	AMW	VLW	VMW	SRV	IRV	MMRD	MRIZL	MLRD	LRIZL	LWL	IONSL	SRD	IRD	VOD	MRD	LRD	HOD	VMI	HMI	MI	SRVC	IRVC	MRVC	LRVC	SOVC	OVC	CI	OV	OVA	MRV	MRVOA	LRV	LRVOA	AMRON	ALRON	Age	Sex	BCVA	IOP
1	1	0	1	1.38	34	163	734	4.36	2.17	4.03	15.87	0.71	0.45	0.51	1.1	0.5	0.96	0.43	1.69	4.41	3.09	0.5	0.45	2.08	0.25	0.41	2.1	0.46	0.31	0.46	0.33	0.2	0.22	0.32	0.07	3.45	0.33	8.51	2.78	1	0.39	0.79	0.42	22.33	25.58	25	2	0	21
2	1	0	2	1.26	32	170	650	4.38	3.11	3.92	8.78	0.55	0.25	1.2	1.21	0.36	0.95	0.39	1.41	4.43	3.24	0.39	0.26	1.78	0.18	0.37	1.91	0.37	0.29	0.37	0.28	0.11	0.1	0.23	0.05	2.86	0.27	8.51	2.62	0.7	0.4	0.94	0.17	19.19	27.03	36	1	0	15
2	1	0	1	1.16	29	161	688	3.82	2.79	3.93	10.3	0.56	0.24	0.84	1.25	0.37	1.03	0.35	1.49	4.43	3.21	0.35	0.2	0.79	0.14	0.36	1.97	0.7	0.25	0.7	0.23	0.09	0.11	0.32	0.05	2.81	0.28	8.48	2.79	0.64	0.18	0.81	0.4	15.33	30.41	36	1	0	16
3	1	0	2	1.64	30	154	708	5.13	2.34	5.49	9.28	0.34	0.71	0	0	0.39	0.3	0.51	1.63	4.25	3.24	0.32	0.35	1.59	0.2	0.6	1.87	0.42	0.43	0.43	0.33	0.15	0.16	0.57	0.07	2.58	0.5	7.35	2.04	0.91	0.22	1.14	0.39	16.79	16.8	37	1	0	13
4	1	0	1	1.71	32	161	789	5.13	2.2	5.41	-7.01	0.6	0.22	0.45	1.44	0.43	0.94	0.4	1.69	4.15	3.06	0.24	0.6	1.99	0.36	0.26	2.11	0.42	0.29	0.42	0.23	0.39	0.13	0.32	0.13	3.3	0.36	7.94	2.59	0.76	0.32	0.66	0.32	20.7	17.99	51	1	0.1	21
5	1	0	2	1.73	35	171	728	5.36	2.79	5	-12.34	0.42	0.71	0.46	0.96	0.43	1.39	0.37	1.92	4.08	2.98	0.18	0.37	1.74	0.18	0.3	2.05	0.32	0.23	0.32	0.16	0.21	0.2	0.26	0.05	2.68	0.33	8.79	2.81	0.65	0.24	0.68	0.34	27.05	32.21	45	1	0	19
6	1	0	2	0.64	19	173	581	2.63	1.88	3.46	6.88	0.63	0.11	0.75	1.54	0.41	0.77	0.43	1.59	4.15	3.05	0.35	0.61	1.83	0.21	0.47	2.25	0.52	0.3	0.52	0.29	0.39	0.17	0.56	0.08	3.32	0.45	8.37	2.9	0.85	0.26	0.82	0.37	23.34	25.04	39	1	0	21
6	1	0	1	0.87	22	155	606	3.11	2.01	3.88	6.57	0.63	-0.01	0.96	1.43	0.45	0.53	0.32	1.56	4.05	3	0.35	0.47	1.9	0.3	0.37	2.25	0.43	0.3	0.43	0.27	0.22	0.18	0.32	0.1	3.35	0.33	8.3	2.93	0.83	0.28	0.67	0.31	26.24	32.53	39	1	0.05	20
7	1	0	1	1.4	28	179	725	4.46	2.73	5.06	11.42	0.48	0.1	0.71	1.39	0.05	1.66	0.34	1.51	4.3	3.27	0.24	0.38	1.8	0.34	0.21	2.06	0.34	0.27	0.34	0.26	0.21	0.28	0.31	0.04	2.94	0.37	9.18	2.97	1.03	0.54	0.57	0.3	14.04	33.76	59	1	0	19
8	1	0	1	0.95	30	158	675	3.31	2.11	3.17	3.01	0.52	0.31	0	0	0.43	1.27	0.31	1.3	4.05	3.01	0.77	0.25	1.74	0.32	0.42	1.8	0.59	0.41	0.59	0.7	0.18	0.22	0.26	0.06	2.56	0.55	7.34	2.27	1.02	0.45	0.78	0.45	12.58	28.42	26	2	0	21
9	1	0	2	1.28	27	151	669	4.29	3.34	4.69	-1.54	0.79	-0.08	0.68	1.12	0.75	1.73	0.44	1.88	4.19	3.19	0.32	0.26	1.78	0.5	0.58	2.26	0.33	0.48	0.48	0.2	0.09	0.38	0.59	0.07	3.52	0.38	7.59	2.32	1.88	0.71	1.03	0.43	0	12.68	46	2	0	22
9	1	0	1	0.94	23	163	639	3.3	2.55	4.11	-4.22	0.79	-0.01	0.91	1.45	0.48	1.37	0.26	1.8	4.13	3.12	0.33	0.24	1.99	0.28	0.6	2.34	0.29	0.38	0.38	0.29	0.12	0.2	0.32	0.13	3.62	0.29	7.62	2.28	1.08	0.46	0.45	0.21	13.61	22.3	46	2	0	24
10	1	0	2	1.46	32	170	709	4.61	2.29	4.62	4.24	0.79	0.48	1.17	1.75	0.4	0.76	0.4	1.74	4.15	3.18	0.68	0.72	1.89	0.18	0.52	2.22	0.74	0.32	0.74	0.67	0.54	0.17	0.34	0.09	3.47	0.52	8.39	2.41	1.02	0.26	1.07	0.39	7.42	19.32	51	1	0	19
10	1	0	1	1.52	34	178	709	4.95	2.6	4.48	5.16	0.77	0.45	0.89	1.84	0.45	1.25	0.43	1.47	4.15	3.18	0.22	0.69	1.71	0.18	0.38	2.28	0.53	0.25	0.53	0.19	0.57	0.14	0.32	0.07	3.38	0.38	7.93	2.46	1.2	0.42	1.25	0.6	12.34	16.71	51	1	0	23
11	1	0	2	1.09	28	160	653	3.92	2.76	3.94	7.15	0.71	-0.29	1.09	1.44	0.51	1.06	0.48	1.83	4.22	3.3	0.22	0.44	2.05	0.43	0.27	2.12	0.32	0.33	0.33	0.23	0.28	0.19	0.52	0.09	3.7	0.35	9.12	2.93	1.22	0.48	1.08	0.54	13.74	19.37	43	1	0	23
11	1	0	1	1.21	29	188	670	4.44	2.81	4.16	5.75	0.73	-0.22	1.15	1.96	0.54	0.91	0.45	1.6	4.24	3.46	0.23	0.79	2.16	0.19	0.56	2.18	0.47	0.34	0.47	0.19	0.42	0.22	0.32	0.1	3.87	0.32	9.24	3.02	1.23	0.56	0.95	0.62	4.74	16.7	43	1	0	26
12	1	0	2	1.42	30	178	744	4.61	2.47	4.7	3.92	0.54	0.24	0.55	1.14	0.4	1.52	0.42	1.52	4.4	3.01	0.31	0.21	1.71	0.24	0.35	1.93	0.3	0.31	0.31	0.18	0.12	0.15	0.29	0.14	2.93	0.3	8.34	2.61	0.81	0.39	0.69	0.4	11.51	12.76	53	2	0	15
13	1	0	2	1.33	23	178	747	4.14	2.23	5.79	1.19	0.68	0.14	0.47	0.98	0.28	1.02	0.42	1.97	4.32	3.12	0.28	0.31	1.79	0.1	0.56	1.95	0.33	0.34	0.34	0.15	0.15	0.13	0.51	0.07	3.2	0.32	8.57	2.21	0.76	0.24	0.8	0.38	19.07	14.45	43	1	0	26
14	1	0	2	1.5	30	160	744	4.42	2.29	4.96	3.3	0.51	-0.32	0.76	0.87	0.44	1.47	0.38	1.84	4.49	3.16	0.43	0.36	1.9	0.17	0.34	2.06	0.42	0.25	0.42	0.33	0.21	0.2	0.29	0.04	3.24	0.33	9.56	2.99	0.89	0.39	0.84	0.37	13.76	16.87	52	2	0	18
14	1	0	1	1.49	30	161	762	4.36	2.16	4.9	-2.82	0.53	-0.51	0.5	0.9	0.41	1.17	0.4	1.82	4.46	3.19	0.38	0.39	1.98	0.31	0.4	2.13	0.39	0.33	0.39	0.26	0.27	0.26	0.48	0.07	3.31	0.4	9.47	2.96	0.81	0.46	0.89	0.41	14.22	23.75	52	2	0	20
15	1	0	2	1.28	25	189	711	4.09	2.19	5.19	2.57	0.38	0.01	0.41	0.8	0.38	1.72	0.35	0.93	4.08	2.71	0.28	0.32	1.66	0.18	0.33	1.99	0.36	0.26	0.36	0.23	0.16	0.13	0.29	0.08	2.49	0.36	7.59	2.14	0.76	0.15	0.55	0.34	17.98	26.61	36	2	0	18
15	1	0	1	1.38	28	186	744	4.33	2.32	4.91	6.96	0.38	0.26	0.45	0.99	0.38	1.1	0.29	1.55	4.05	2.7	0.25	0.3	1.64	0.18	0.29	2.03	0.34	0.23	0.34	0.28	0.15	0.14	0.32	0.09	2.66	0.37	7.56	2.39	0.56	0.24	0.52	0.35	21.26	25.99	36	2	0.05	16
16	1	0	1	1.37	32	163	697	4.45	2.51	4.34	4.17	0.9	-0.2	1.15	1.61	0.88	2.04	0.38	1.94	4.38	3.52	0.71	0.52	1.99	0.74	0.48	2.27	0.62	0.54	0.62	0.52	0.37	0.73	0.32	0.13	3.81	0.54	9.59	3.16	1.99	1.02	0.93	0.32	0	22.75	63	1	0.1	17
17	1	0	1	1.82	33	144	650	6.05	3.44	5.59	6.56	0.57	0.1	0.69	1.53	0.47	1.17	0.41	1.28	4.36	3.07	0.31	0.46	1.56	0.23	0.36	2.21	0.49	0.27	0.49	0.31	0.32	0.26	0.32	0.08	2.95	0.44	8.3	2.58	0.89	0.43	0.96	0.42	18.7	30.37	29	2	0	21
18	1	0	2	1.79	38	147	684	5.96	3.1	4.61	3.1	0.85	0.26	0.4	1.19	0.39	1.15	0.38	1.98	4.09	3.22	0.3	0.36	1.56	0.18	0.49	1.74	0.42	0.39	0.42	0.17	0.18	0.11	0.4	0.05	2.54	0.36	8.87	2.56	0.85	0.41	1.03	0.56	16.12	17.99	45	2	0	19
18	1	0	1	2.01	40	160	678	6.67	3.58	4.86	-20.25	0.84	-0.92	0.53	2.01	0.51	1.23	0.46	1.65	4.13	3.12	0.24	0.72	1.64	0.17	0.45	1.78	0.58	0.35	0.58	0.16	0.43	0.17	0.29	0.07	2.58	0.43	9.03	2.93	1.04	0.47	0.82	0.57	20.5	29.9	45	2	0	21
19	1	0	1	1.18	23	203	710	3.88	2.13	5.18	2.32	0.55	0.29	0.4	0.8	0.45	1.31	0.48	1.79	4.34	3.33	0.24	0.64	1.69	0.15	0.42	1.85	0.52	0.31	0.52	0.24	0.44	0.14	0.32	0.07	2.52	0.48	8.76	2.56	0.91	0.44	0.98	0.55	20.78	23.69	58	1	0.05	14
20	1	0	2	1.85	31	151	762	5.77	2.85	5.93	0.42	0.41	0.04	0.72	0.86	0.32	0.98	0.33	1.5	4.1	2.9	0.29	0.29	1.42	0.2	0.38	1.99	0.41	0.29	0.41	0.17	0.16	0.14	0.25	0.07	2.33	0.34	7.64	2.55	0.59	0.19	0.5	0.16	20.67	22.68	31	2	0	17
20	1	0	1	1.87	33	146	761	5.68	2.76	5.62	0.76	0.25	0.04	0.79	1.19	0.35	0.99	0.38	1.43	4.06	2.92	0.36	0.17	1.45	0.19	0.45	2.05	0.37	0.31	0.37	0.28	0.1	0.17	0.32	0.08	2.54	0.37	7.79	2.64	0.74	0.22	0.92	0.24	17.9	20.21	31	2	0	18
21	1	0	2	2.14	39	167	750	6.6	3.59	5.49	2.03	0.9	0.17	0.74	1.88	0.45	0.77	0.3	1.5	4.39	3.15	0.47	0.49	1.76	0.2	0.4	1.93	0.55	0.31	0.55	0.42	0.33	0.23	0.41	0.07	3.33	0.44	8.36	2.23	1.08	0.39	1.07	0.42	15.48	23.96	47	1	0	18
21	1	0	1	2.11	39	179	762	6.62	3.94	5.41	4.36	0.65	0.19	0.5	1.81	0.34	1.68	0.48	0.86	4.33	3.18	0.34	0.49	1.87	0.28	0.18	2.01	0.44	0.23	0.44	0.28	0.41	0.29	0.36	0.11	3.27	0.44	8.53	2.35	0.98	0.22	1	0.32	19.66	26.88	47	1	0	19
22	1	0	2	1.81	32	161	688	5.61	3.05	5.64	11.24	0.56	0.22	0.73	1.24	0.39	0.68	0.51	1.44	4.14	3.08	0.53	0.32	2.06	0.21	0.57	2.25	0.41	0.35	0.41	0.49	0.18	0.22	0.47	0.13	3.52	0.42	7.98	2.49	0.88	0.26	1.08	0.3	12.3	20.15	34	1	0	15
23	1	0	2	1.3	33	169	756	3.95	2.01	4	-4.52	1.16	-0.08	0.49	1.23	0.37	1.41	0.47	1.92	4.43	2.85	0.24	0.55	1.85	0.19	0.59	2.29	0.43	0.34	0.43	0.16	0.32	0.14	0.52	0.04	3.41	0.35	9	2.43	0.93	0.47	0.95	0.69	16.87	15.56	63	1	0	21
23	1	0	1	1.09	29	170	712	3.36	1.85	3.73	-11.27	1.52	-0.19	0.57	0.09	0.45	1.43	0.51	1.87	4.44	2.92	0.39	0.32	1.79	0.17	0.68	2.09	0.4	0.41	0.41	0.33	0.12	0.12	0.5	0.04	2.87	0.39	8.98	2.73	1.01	0.55	0.98	0.58	18.49	23.06	63	1	0	19
24	1	0	2	1.79	37	155	719	6.22	2.7	4.79	8.01	0.38	-0.21	0.8	1.15	0.41	1.39	0.34	1.69	4.41	3	0.28	0.35	1.74	0.26	0.48	2.45	0.36	0.3	0.36	0.21	0.16	0.17	0.56	0.05	3.78	0.3	8.36	2.47	0.81	0.39	0.87	0.48	20.89	18.94	36	1	0	17
24	1	0	1	1.62	36	175	712	5.36	3.19	4.51	8.9	0.42	-0.22	0.73	1.02	0.34	1.09	0.43	1.8	4.33	3.02	0.34	0.37	1.72	0.18	0.58	2.37	0.41	0.32	0.41	0.26	0.17	0.14	0.32	0.06	3.73	0.25	8.56	2.72	0.83	0.34	0.77	0.45	20.63	23.76	36	1	0	21
25	1	0	2	0.87	28	160	694	2.85	1.88	3.1	8.85	0.56	0.63	0.8	1.27	0.35	0.46	0.37	1.88	4.27	3.32	0.33	0.35	1.54	0.2	0.49	2.06	0.44	0.33	0.44	0.2	0.16	0.21	0.59	0.12	2.71	0.47	7.94	2.47	1	0.36	1.1	0.54	14.9	17.25	48	2	0	14
25	1	0	1	0.86	28	163	678	2.98	1.73	3.1	10.78	0.52	0.64	0.79	1.16	0.39	1.27	0.42	1.4	4.26	3.38	0.27	0.32	1.51	0.19	0.42	1.95	0.39	0.31	0.39	0.23	0.15	0.19	0.32	0.1	2.55	0.39	7.83	2.45	1.13	0.44	1	0.51	12.07	10.16	48	2	0	16
26	1	0	1	1.08	30	166	625	3.74	2.93	3.62	1.35	0.63	0.2	0.65	0.77	0.32	0.7	0.43	1.63	4.05	3.02	0.16	0.28	1.65	0.2	0.48	1.96	0.27	0.35	0.35	0.18	0.17	0.1	0.36	0.04	3.09	0.28	7.49	2.22	0.97	0.33	1.05	0.44	22.35	14.71	38	1	0.05	12
27	1	0	2	1.23	29	158	628	4.15	2.68	4.25	-2.73	0.56	-0.15	1.18	1.76	0.52	1.04	0.44	1.47	4.19	3.15	0.36	0.27	1.73	0.27	0.37	2.12	0.36	0.3	0.36	0.44	0.17	0.2	0.42	0.09	2.94	0.45	8.42	2.55	1.55	0.6	0.98	0.61	6.82	18.41	52	2	0	18
28	1	0	2	1.81	27	156	666	5.96	2.95	6.67	0.03	0.38	0.02	0.43	0.84	0.31	1.21	0.32	1.69	4.42	3.1	0.35	0.3	1.67	0.18	0.39	2.08	0.39	0.27	0.39	0.26	0.17	0.2	0.42	0.09	2.98	0.38	8.14	2.58	0.64	0.17	0.6	0.21	27.23	23.21	24	2	0	21
29	1	0	2	0.82	25	146	622	2.82	1.76	3.36	-8.33	0.96	-0.46	0.92	1.6	0.56	2.06	0.47	1.96	4.06	3.23	0.52	0.49	1.79	0.38	0.56	2.11	0.56	0.45	0.56	0.44	0.28	0.3	0.44	0.1	3.05	0.51	8.48	2.65	1.04	0.59	0.9	0.55	15.21	17.31	52	2	0.05	17
29	1	0	1	0.85	26	147	619	2.98	1.98	3.22	-6.81	0.78	-0.52	0.73	1.17	0.44	1.9	0.49	1.91	4.02	3.25	0.44	0.63	1.85	0.4	0.67	2.19	0.58	0.49	0.58	0.44	0.34	0.26	0.32	0.07	3.07	0.47	8.48	2.69	1.18	0.55	1.37	0.82	7.97	12.91	52	2	0	16
30	1	0	2	1.75	38	152	671	6.54	2.99	4.59	11.41	0.35	0.36	0.54	0.76	0.32	0.85	0.36	1.8	3.89	2.87	0.27	0.27	1.67	0.16	0.84	1.82	0.32	0.55	0.55	0.18	0.13	0.13	0.28	0.04	2.34	0.32	7.64	1.78	0.48	0.12	0.8	0.36	13.11	16.62	39	2	0	19
31	1	0	1	1.5	34	1.59	753	4.58	2.13	4.45	7.96	0.39	0.34	0.62	1.24	0.48	1.35	0.29	1.44	4.02	3.07	0.81	0.38	1.7	0.3	0.45	1.64	0.7	0.46	0.7	0.7	0.15	0.19	0.32	0.05	2.45	0.58	7.48	2.36	0.9	0.4	0.72	0.26	12.07	18.22	41	2	0	17
1	2	0	2	1.61	35	157	759	4.92	2.26	4.59	12.59	0.74	0.21	0.42	0.87	0.43	0.58	0.42	1.81	4.41	3.07	0.48	0.47	2.11	0.2	0.51	2.2	0.45	0.32	0.45	0.39	0.25	0.25	0.42	0.13	3.47	0.41	8.64	2.76	0.84	0.27	0.94	0.39	15.15	32.36	25	2	0	21
32	2	0	2	1.51	32	150	641	5.14	2.76	4.77	4.48	0.39	0.18	0.73	2.07	0.45	0.54	0.5	1.48	4.15	3.29	0.27	0.81	2.19	0.18	0.41	2.25	0.49	0.26	0.49	0.17	0.66	0.18	0.47	0.13	3.36	0.48	8.64	2.71	1.15	0.38	1.16	0.52	12.37	19.18	56	2	0.1	22
32	2	0	1	1.34	30	163	636	4.63	2.96	4.48	4.1	0.55	0.2	0.68	1.26	0.46	0.43	0.42	1.43	4.19	3.25	0.45	0.45	1.88	0.2	0.49	2.18	0.48	0.32	0.48	0.43	0.32	0.14	0.32	0.11	3.36	0.39	8.64	2.89	0.78	0.29	0.77	0.45	18.91	20.56	56	2	0.15	18
33	2	0	2	1.04	22	153	619	3.83	2.41	4.8	9.37	0.36	0.25	0.76	1.35	0.35	0.83	0.36	1.64	4.23	3.42	0.19	0.27	1.89	0.2	0.3	1.87	0.24	0.27	0.27	0.15	0.1	0.13	0.23	0.07	2.86	0.24	7.47	2.62	0.7	0.28	0.63	0.26	16.69	31.3	56	2	0.05	14
33	2	0	1	1	23	164	629	3.89	2.2	4.31	10.28	0.3	0.15	1.04	2.51	0.32	0.78	0.35	1.36	4.16	3.61	0.21	0.71	1.85	0.19	0.32	1.93	0.5	0.26	0.5	0.16	0.49	0.15	0.32	0.07	2.56	0.46	7.74	2.68	0.72	0.33	0.86	0.35	10.67	31.66	56	2	0.15	20
34	2	0	2	1.46	30	258	812	5.34	4.17	4.93	2.9	0.42	0.23	0.97	1.8	0.55	0.11	0.46	1.38	4.24	3.97	0.32	0.65	1.71	0.19	0.54	2.26	0.57	0.32	0.57	0.36	0.61	0.2	0.65	0.12	3.4	0.57	8.92	2.64	1.39	0.4	1.1	0.53	11.69	23.46	34	1	0	18
34	2	0	1	1.76	36	221	809	5.32	3.24	4.92	2.05	0.47	0.12	0.99	1.89	0.57	1.44	0.43	1.15	4.26	3.84	0.18	0.62	1.67	0.27	0.29	2.11	0.48	0.27	0.48	0.18	0.46	0.3	0.32	0.1	2.94	0.46	9.09	3.23	1.65	0.82	0.82	0.39	9.91	18.1	34	1	0.05	18
35	2	0	2	1.29	26	170	691	4.14	2.38	4.88	-0.37	0.46	0.49	0.62	1.21	0.59	1.64	0.52	1.37	3.87	3.39	0.6	0.36	1.7	0.38	0.52	1.84	0.56	0.49	0.56	0.47	0.24	0.2	0.37	0.09	2.54	0.54	8.12	2.79	1.39	0.56	1.12	0.43	7.58	27.45	54	2	0.3	18
35	2	0	1	1.34	30	178	684	4.45	2.54	4.39	-3.6	0.56	0.45	0.59	1.66	0.67	1.8	0.49	1.24	3.85	3.44	0.57	0.35	1.85	0.47	0.38	1.89	0.49	0.45	0.49	0.48	0.32	0.29	0.38	0.11	3.33	0.47	8.25	2.58	1.42	0.61	1.29	0.47	14.11	28.63	54	2	0.3	20
3	2	0	1	1.59	30	158	697	5.16	2.62	5.49	8.03	0.34	0.72	1.26	1.13	0.48	0.32	0.56	1.15	4.28	3.41	0.53	0.33	1.75	0.23	0.6	1.93	0.49	0.43	0.49	0.45	0.15	0.18	0.32	0.12	2.7	0.45	7.33	2.09	1.29	0.3	1.14	0.4	10.83	14.27	37	1	0	12
4	2	0	2	1.41	26	175	712	4.45	2.23	5.39	-5.48	0.62	0.13	0.45	1.82	0.51	1.2	0.42	1.5	4.1	3.26	0.24	0.83	1.92	0.47	0.27	2.21	0.56	0.33	0.56	0.23	0.74	0.29	0.3	0.04	3.39	0.47	7.84	2.46	1.68	0.65	0.91	0.42	9.6	13.74	51	1	0.22	37
36	2	0	2	1.27	26	188	734	4.1	2.14	4.82	5.09	0.59	0.08	0.89	1.93	0.54	0.99	0.41	1.7	4.07	3.18	0.27	0.66	1.86	0.25	0.43	2.27	0.5	0.3	0.5	0.3	0.37	0.34	0.51	0.1	3.31	0.49	7.78	2.02	1.03	0.42	1.11	0.58	8.99	10.1	58	1	0.15	31
36	2	0	1	1.16	26	189	721	4.01	2.21	4.45	-2.98	0.67	0.18	0.87	1.66	0.35	1.35	0.35	1.54	4.07	3.14	0.5	0.6	1.96	0.36	0.5	2.19	0.56	0.39	0.56	0.58	0.34	0.38	0.32	0.09	3.47	0.49	7.77	2.38	0.91	0.5	1.34	0.52	12.97	13.01	58	1	0	20
7	2	0	2	1.31	25	187	688	5.62	4.42	5.29	10.59	0.45	0.08	0.69	2.06	0.35	1.66	0.63	1.48	4.35	3.46	0.29	0.6	1.78	0.63	0.27	2.08	0.5	0.43	0.5	0.19	0.41	0.47	0.31	0.04	3.05	0.47	9.15	2.74	1.85	0.91	0.73	0.36	0	12.9	59	1	0.1	33
8	2	0	2	0.96	29	154	697	3.07	1.94	3.36	7	0.69	0.45	1.54	0.82	0.38	1.15	0.47	1.59	4.06	3.02	0.65	0.28	1.71	0.26	0.55	1.82	0.54	0.45	0.54	0.61	0.18	0.17	0.47	0.08	2.46	0.61	7.34	2.29	0.84	0.4	1.01	0.6	10.34	15.79	26	2	0	18
37	2	0	2	1.58	26	157	694	5.17	2.51	6.1	8.32	0.92	1.06	0.73	1.71	0.48	0.89	0.51	1.6	4.32	3.47	0.37	0.59	1.76	0.43	0.39	1.99	0.55	0.41	0.55	0.17	0.33	0.27	0.39	0.08	2.92	0.42	8.03	2.13	1.23	0.33	1.08	0.32	11.02	15.09	34	2	0.1	13
37	2	0	1	1.7	28	177	750	5.32	2.48	6.15	7.61	0.92	0.86	0.68	1.68	0.43	0.57	0.41	1.22	4.35	3.47	0.31	0.53	1.79	0.3	0.57	1.99	0.47	0.44	0.47	0.24	0.31	0.22	0.32	0.07	3.08	0.38	7.95	2.22	1.01	0.22	1.04	0.42	6.85	10.72	34	2	0	18
38	2	0	2	1.96	36	162	759	5.92	2.73	5.46	-0.92	0.6	-0.23	0.48	1.56	0.55	1.19	0.43	1.74	4.4	2.93	0.42	0.53	1.59	0.19	0.4	1.94	0.6	0.3	0.6	0.29	0.34	0.16	0.35	0.05	2.56	0.46	8.46	2.23	1.18	0.49	1.05	0.44	13.26	18.81	27	2	0	11
38	2	0	1	1.78	35	162	731	5.42	2.29	5.09	1.1	0.37	-0.18	0.48	1.4	0.38	0.98	0.43	1.55	4.26	2.83	0.38	0.42	1.49	0.19	0.34	1.99	0.54	0.27	0.54	0.17	0.27	0.16	0.37	0.06	2.49	0.41	8.31	2.22	1.01	0.44	1.03	0.49	14.26	24.66	27	2	0	15
39	2	0	2	1.23	30	160	710	4.05	2.01	4.05	1.68	0.73	0.33	0.83	1.84	0.63	2.03	0.36	1.22	4.2	3.15	0.5	0.5	2.05	0.48	0.79	2.28	0.49	0.56	0.56	0.49	0.31	0.4	0.58	0.05	3.55	0.52	9.31	2.98	0.98	0.57	1.47	0.94	11.83	6.11	36	2	0.05	23
39	2	0	1	1.47	34	153	656	5.13	3.19	4.36	-3.62	0.62	0.12	0.95	1.97	0.7	1.58	0.53	1.5	4.23	3.12	0.78	0.51	1.99	0.63	0.51	2.13	0.65	0.54	0.65	0.71	0.34	0.39	0.59	0.07	3.51	0.6	9.23	2.89	1.77	0.51	1.03	0.87	0	9.1	36	2	0.05	21
40	2	0	2	1.43	30	145	694	4.51	2.48	4.75	9.43	0.43	0.04	0.49	1.5	0.49	1.44	0.38	1.73	4.26	3	0.23	0.8	1.83	0.29	0.48	1.88	0.56	0.41	0.56	0.22	0.46	0.17	0.31	0.1	2.43	0.52	8.61	2.4	1.11	0.47	0.93	0.44	8.66	11.81	47	2	0	21
40	2	0	1	1.43	30	141	696	4.59	4.19	477	7.56	0.52	0.18	0.61	1.33	0.4	1.46	0.42	1.97	4.16	2.97	0.31	0.75	2.02	0.27	0.4	1.99	0.52	0.34	0.52	0.26	0.47	0.29	0.41	0.17	3.21	0.5	8.8	2.69	0.98	0.46	0.95	0.48	6.94	11.83	47	2	0.05	17
12	2	0	1	1.37	31	174	772	4.11	2.12	4.48	6.47	0.56	0.28	0.75	1.3	0.4	0.83	0.42	1.61	4.43	3.14	0.32	0.4	1.68	0.16	0.41	2.15	0.43	0.27	0.43	0.18	0.27	0.16	0.32	0.05	3.2	0.31	8.36	2.5	0.83	0.42	0.91	0.47	12.92	23.74	53	2	0	28
13	2	0	1	1.44	23	173	738	4.42	2.41	6.24	1.33	0.92	0.29	0.53	1.85	0.49	1.1	0.43	1.71	4.3	3.33	0.29	0.81	1.9	0.27	0.34	2.07	0.58	0.29	0.58	0.17	0.66	0.24	0.4	0.06	3.37	0.45	8.56	2.28	0.96	0.3	0.87	0.22	21.47	14.27	43	1	0	30
41	2	0	1	1.7	29	168	728	5.36	2.63	5.98	4.59	0.19	0.06	0.79	1.23	0.36	0.71	0.33	1.16	4.27	3.48	0.34	0.38	1.63	0.32	0.34	1.83	0.44	0.36	0.44	0.29	0.24	0.19	0.32	0.15	2.95	0.4	8.18	2.6	0.81	0.22	0.7	0.31	15.57	28.17	34	1	0	20
41	2	0	2	1.52	28	177	698	4.89	2.24	5.46	6.76	0.25	0.12	0.64	1.17	0.34	0.54	0.42	1.32	4.28	3.44	0.29	0.38	1.6	0.3	0.41	1.85	0.42	0.38	0.42	0.3	0.16	0.2	0.39	0.07	2.89	0.39	8.15	2.52	0.84	0.18	0.65	0.23	19.6	36.07	34	1	0	23
42	2	0	2	1.49	31	162	706	4.7	2.54	4.86	4.18	0.96	-0.71	1.08	2.04	0.56	1.18	0.53	2.14	3.77	3.21	0.42	0.44	2.01	0.23	0.9	2.49	0.43	0.45	0.45	0.57	0.32	0.2	0.86	0.11	4.14	0.5	9.97	2.87	1.48	0.62	1.3	0.81	14.85	6.31	28	2	0.3	13
43	2	0	2	1.49	24	165	738	4.58	2.38	6.21	6.41	0.64	0.3	0.82	1.3	0.3	1.11	0.41	1.95	4.36	3.7	0.3	0.32	1.65	0.22	0.38	1.72	0.38	0.35	0.38	0.2	0.19	0.14	0.28	0.09	2.6	0.35	7.66	2.24	0.93	0.32	0.92	0.45	7.49	10.09	41	1	0	15
43	2	0	1	1.6	27	164	753	4.8	2.35	5.94	5.83	0.69	0.24	0.97	1.52	0.25	1.03	0.34	1.88	4.34	3.65	0.27	0.38	1.65	0.22	0.66	1.77	0.39	0.5	0.5	0.28	0.27	0.18	0.32	0.1	2.79	0.41	7.87	2.27	1.06	0.25	1.17	0.45	12.57	12.05	41	1	0	18
16	2	0	2	0.99	23	170	628	3.98	1.99	4.28	1.21	0.87	-0.27	1.25	1.53	0.75	2.18	0.44	2	4.27	3.44	0.62	0.45	1.94	0.83	0.54	2.42	0.55	0.57	0.57	0.64	0.26	0.72	0.55	0.13	3.69	0.62	10.08	3.47	1.64	0.71	0.9	0.36	0	21.67	63	1	0.05	14
44	2	0	2	1.34	25	161	691	4.45	2.26	5.46	8.51	0.58	-0.04	1.12	1.43	0.48	0.66	0.35	1.51	4.28	3.59	0.49	0.42	2.01	0.32	0.58	2.3	0.45	0.39	0.45	0.43	0.22	0.19	0.46	0.17	4.15	0.35	9.01	2.76	1.19	0.51	1.07	0.46	17.33	14.55	31	1	0	23
44	2	0	1	1.42	25	162	662	4.73	2.32	5.76	7.47	0.56	-0.14	1.21	1.75	0.48	0.65	0.47	1.56	4.25	3.44	0.6	0.45	2.06	0.3	0.58	2.25	0.51	0.39	0.51	0.49	0.25	0.22	0.32	0.21	4.25	0.35	8.84	2.71	1.38	0.51	1.09	0.55	8.13	15.82	31	1	0	17
17	2	0	2	1.96	33	145	653	6.74	3.2	5.9	3.8	0.58	0.18	0.75	0.89	0.36	1.17	0.38	1.51	4.31	3.04	0.37	0.27	1.66	0.25	0.42	2.25	0.39	0.3	0.39	0.35	0.2	0.19	0.33	0.1	3.08	0.38	8.55	2.64	0.8	0.46	0.85	0.4	9.22	24.46	29	2	0	20
45	2	0	2	2.09	38	187	798	6.49	3.74	5.53	7.8	0.4	0.11	0.83	1.51	0.46	0.69	0.43	1.43	4.07	3.34	0.52	0.32	1.94	0.18	0.56	1.85	0.43	0.4	0.43	0.39	0.13	0.2	0.47	0.11	2.99	0.43	8.14	2.53	1.16	0.48	1	0.47	13.97	11.81	46	2	0	17
45	2	0	1	1.86	34	186	803	5.63	3.65	5.45	8.24	0.43	0.15	0.9	1.43	0.54	1.23	0.52	1.33	4.05	3.32	0.63	0.52	1.94	0.31	0.36	1.85	0.59	0.36	0.59	0.72	0.19	0.29	0.4	0.16	3.07	0.57	8.1	2.61	1.38	0.62	0.99	0.41	8.69	24.7	46	2	0	20
46	2	0	1	1.22	27	164	689	4.42	2.84	4.49	4.59	0.39	0	1.54	1.09	0.8	0.87	0.47	1.58	4.16	2.94	0.47	1.01	2.1	0.35	0.58	1.95	0.7	0.48	0.7	0.32	0.8	0.15	0.48	0.12	3.16	0.59	8.49	2.44	1.46	0.47	0.78	0.32	23.24	16.09	63	1	0.3	35
47	2	0	1	1.37	25	153	660	4.41	2.14	5.41	8.93	1.01	0.45	0.86	0.94	0.36	0.91	0.3	1.97	4.25	2.92	0.49	0.34	1.99	0.13	0.38	2.33	0.42	0.22	0.42	0.42	0.16	0.14	0.32	0.07	3.97	0.28	8.9	2.69	0.78	0.26	0.58	0.3	14.25	29.74	49	2	0.22	25
22	2	0	1	1.89	34	173	722	6.07	4.58	5.62	14.38	0.51	0.2	0.81	1.42	0.42	0.82	0.46	1.42	4.09	3.04	0.53	0.39	2.09	0.29	0.53	2.18	0.44	0.38	0.44	0.37	0.19	0.16	0.32	0.1	3.48	0.33	7.92	2.61	0.85	0.24	0.99	0.39	14.27	27.21	34	1	0	14
48	2	0	2	1.22	30	177	742	3.8	2.38	4.07	-2.49	0.44	0.2	1.21	1.65	0.63	1.21	0.43	2.15	4.35	3.81	0.48	0.42	1.89	0.1	0.45	1.9	0.47	0.29	0.47	0.37	0.23	0.12	0.42	0.12	2.84	0.44	9.19	3.01	1.17	0.47	0.95	0.34	11.5	13.38	43	1	0.1	27
48	2	0	1	1.27	33	181	792	3.7	2.4	3.86	-1.89	0.43	0.13	1.51	2.01	0.45	1.28	0.54	2.35	4.28	3.67	0.26	0.33	1.52	0.14	0.83	1.86	0.39	0.52	0.52	0.22	0.17	0.1	0.63	0.06	2.73	0.43	9.08	3	0.83	0.22	1.09	0.52	9.2	25.85	43	1	0.05	26
49	2	0	2	1.56	31	157	731	4.8	2.54	5.14	-5.1	0.54	-0.42	0.95	2.11	1.06	1.82	0.73	1.42	4.34	3.48	0.36	0.82	2.11	0.8	0.57	2.38	0.56	0.58	0.58	0.21	0.57	0.77	0.54	0.14	3.98	0.56	9.01	2.55	2.47	1.22	1.5	0.53	0	0	53	2	0.15	33
26	2	0	2	1.25	32	147	625	4.31	2.77	3.93	2.49	0.58	0.11	0.62	0.88	0.28	0.76	0.34	1.29	4.05	3.15	0.15	0.33	1.7	0.23	0.53	2	0.28	0.38	0.38	0.25	0.18	0.15	0.39	0.06	3.1	0.33	7.2	1.86	0.78	0.28	0.82	0.23	14.3	19.62	38	1	0.15	16
50	2	0	2	1.45	38	146	725	4.84	2.35	3.85	3.02	0.7	-0.33	1.31	1.73	0.68	1.16	0.38	1.68	3.96	3.41	0.77	0.29	1.94	0.4	0.73	2.12	0.55	0.53	0.55	0.59	0.17	0.26	0.59	0.14	3.42	0.51	7.9	2.25	1.05	0.66	0.86	0.55	11.8	17.04	44	1	0.05	19
50	2	0	1	1.11	28	146	634	4.04	2.32	3.94	7.73	0.61	-0.16	1.34	1.49	0.71	1.29	0.58	1.47	3.92	3.48	0.24	0.37	1.53	0.45	0.77	2.25	0.4	0.54	0.54	0.59	0.31	0.23	0.32	0.07	3.31	0.46	7.86	2.24	1.3	0.68	1.44	0.96	13.87	14.39	44	1	0.05	20
51	2	0	2	0.9	20	203	720	3.01	1.63	4.56	-3.09	0.76	-0.06	1.12	1.21	0.62	2.09	0.77	2.09	4.46	3.67	0.49	0.71	1.68	0.56	1.04	2.3	0.71	0.7	0.71	0.53	0.39	0.51	0.96	0.07	3.32	0.74	9.16	3.2	1.85	0.81	1.86	0.91	0	4.39	65	2	0.05	17
27	2	0	1	1.28	30	162	631	4.42	3.13	4.25	3.46	0.54	-0.49	0.75	1.29	0.44	0.97	0.44	1.81	4.23	3.18	0.44	0.3	1.58	0.27	0.4	2	0.47	0.34	0.47	0.49	0.24	0.19	0.32	0.09	2.79	0.48	8.44	2.44	1.03	0.43	1.04	0.55	11.73	22.13	52	2	0.05	16
30	2	0	1	1.94	42	155	665	6.92	4.48	4.66	8	0.36	0.34	0.43	0.82	0.32	1.09	0.35	1.55	3.97	2.94	0.26	0.34	1.51	0.14	0.28	1.82	0.4	0.23	0.4	0.21	0.11	0.11	0.34	0.04	2.22	0.36	7.99	1.85	0.64	0.25	0.81	0.34	21.8	20.75	39	2	0	18
52	3	1	2	1.12	20	180	678	3.96	2.04	5.65	-6.15	0.87	-0.47	2.33	3.21	1.04	1.78	1.01	2.08	4.13	3.99	1.03	0.45	2.35	0.73	1.17	2.74	0.63	0.69	0.69	0.97	0.54	0.41	1.34	0.16	4.94	0.69	10.22	3.85	2.84	0.85	2.24	0.92	0	0	51	1	0.154902	16
52	3	1	1	1.41	27	211	770	4.82	2.41	5.17	-7.94	0.76	-0.67	2.3	3.57	1.16	1.56	0.95	2.12	4.11	4.01	0.92	0.72	2.3	0.62	0.96	2.5	0.71	0.63	0.71	0.95	0.37	0.63	0.32	0.19	4.71	0.52	9.89	3.53	2.93	0.16	2.33	0.9	0	0	51	1	0.522879	17
53	3	1	2	1.04	25	182	672	3.52	1.95	4.25	3.17	0.96	-0.09	1.35	2.55	0.77	1.8	0.49	2.01	4.32	3.51	0.6	1.04	2.16	0.87	0.46	2.33	0.76	0.57	0.76	0.54	0.97	0.69	0.39	0.12	3.75	0.72	10.1	3.08	2.37	1.41	1.35	0.72	0	9.58	66	1	0.39794	13
53	3	1	1	1.32	30	164	688	4.36	3.11	4.45	-1.53	1.01	-0.17	0.8	2.17	0.87	2.22	0.58	2.47	4.3	3.48	0.39	0.98	2.12	0.92	0.61	2.45	0.65	0.62	0.65	0.31	0.86	0.93	0.49	0.16	4.17	0.66	10.8	3.45	2.39	1.52	1.68	0.91	0	0	66	1	0.221849	12
54	3	1	2	0.93	27	186	712	3.2	2.01	3.49	-3.32	0.43	-0.14	1.45	2.13	1.09	1.38	0.37	1.59	4.31	4.25	0.77	0.38	1.67	0.68	0.56	2.25	0.69	0.55	0.69	0.84	0.19	0.49	0.41	0.06	3.12	0.64	9.81	3.11	2.91	1.08	1.08	0.46	0	7.35	52	1	0.154902	15
54	3	1	1	0.94	27	185	666	3.26	1.91	3.54	-1.04	0.38	-0.4	1.8	1.72	0.96	1.32	0.72	2.09	4.28	4.16	0.66	0.29	1.68	0.71	0.98	2.43	0.57	0.7	0.7	0.69	0.14	0.59	0.32	0.12	3.63	0.51	9.72	3.24	2.72	1.07	2.08	1	0	0	52	1	0.30103	21
55	3	1	2	2.06	34	175	800	6.38	3.94	6.05	-5.39	1	-0.44	0.87	1.74	0.76	1.83	0.44	1.7	4.19	3.14	0.39	0.68	2.17	0.37	0.5	2.26	0.49	0.38	0.49	0.42	0.48	0.4	0.48	0.13	3.53	0.54	8.7	2.91	1.55	0.96	0.91	0.52	0	13.77	35	2	0.0457575	26
55	3	1	1	1.79	32	164	753	5.27	2.57	5.69	-3.28	1.11	-0.29	1.04	1.64	0.92	1.95	0.51	1.71	4.19	3.14	0.35	0.62	1.96	0.57	0.43	2.25	0.49	0.44	0.49	0.43	0.38	0.55	0.32	0.12	3.53	0.51	9.2	3.05	1.73	0.98	0.86	0.48	0	24.85	35	2	0.0457575	27
56	3	1	2	1.63	29	202	846	4.68	2.47	5.65	-6.87	0.63	-0.49	1.82	2	0.9	0.67	0.67	1.44	4.15	3.6	0.69	0.46	1.89	0.45	0.92	2.25	0.61	0.61	0.61	0.68	0.28	0.46	0.99	0.08	3.76	0.66	9.69	2.76	2.24	0.61	1.64	0.66	6.02	13.18	32	1	0.30103	26
56	3	1	1	1.58	30	194	886	4.68	2.55	5.31	-12.21	0.87	-0.54	1.57	1.87	1.2	1.15	0.77	1.7	4.17	3.59	0.57	0.59	2.11	0.75	0.93	2.64	0.55	0.64	0.64	0.78	0.63	0.62	0.32	0.06	4.57	0.53	10.15	3.31	2.16	0.99	2.05	1.06	0	12.2	32	1	0.221849	24
46	3	1	2	1.46	33	173	697	4.97	3.15	4.38	3.59	0.51	0.01	1.3	2	0.45	0.71	0.49	1.66	4.13	2.84	0.47	0.9	2.11	0.37	0.71	1.89	0.65	0.57	0.65	0.34	0.75	0.21	0.65	0.08	3.29	0.62	8.6	2.37	0.72	0.26	0.96	0.33	14.36	15.78	63	1	0.154902	21
57	3	1	2	1.48	27	199	785	4.47	2.13	5.52	6.46	0.28	0.24	0.85	1.2	0.74	0.61	0.87	0.61	4.09	3.75	0.38	0.36	1.81	0.56	0.82	1.88	0.41	0.73	0.73	0.28	0.19	0.34	0.73	0.06	2.82	0.57	7.58	1.8	1.75	0.55	1.45	0.53	0	0	58	1	0.221849	18
49	3	1	1	1.3	22	226	740	5.47	2.26	5.94	-2.93	0.58	-0.3	0.84	2.44	0.97	1.49	0.75	1.55	4.33	3.43	0.36	0.9	2.2	0.7	0.67	2.38	0.57	0.58	0.58	0.22	0.67	0.5	0.7	0.12	3.96	0.56	8.53	2.29	2.46	0.91	1.43	0.38	0	0	49	2	0.39794	23
19	3	1	2	1.37	27	170	666	4.61	2.66	5.05	-1.48	0.73	-0.07	0.56	1.11	0.36	1.17	0.46	1.67	4.37	3.37	0.49	0.5	1.64	0.18	0.31	2.03	0.6	0.24	0.6	0.5	0.37	0.13	0.34	0.07	2.76	0.51	9.26	2.25	0.79	0.41	0.91	0.47	12.43	17.59	53	2	0.154902	35
51	3	1	1	0.92	20	219	722	3.18	2.12	4.65	-4.26	0.77	-0.51	1.17	1.55	0.88	2.08	0.89	2.44	4.43	3.72	0.47	0.75	1.66	0.6	1.09	2.23	0.73	0.76	0.76	0.5	0.36	0.34	0.32	0.1	3.21	0.5	9.6	3.45	2.15	1.08	2.01	1.2	0	0	41	2	0.221849	20
31	3	1	2	0.97	22	182	625	3.61	2.13	4.43	9.93	0.36	0.22	0.71	1.58	0.78	1.51	0.48	1.53	4.1	3.14	0.71	0.49	1.83	0.36	0.52	1.7	0.66	0.52	0.66	0.5	0.3	0.21	0.46	0.07	2.48	0.62	7.45	2.11	1.27	0.56	1.07	0.42	10.29	0	65	2	0.0457575	18
